# Supplementary material
Source: PubMed Central journal article supplement (PMC4058377)

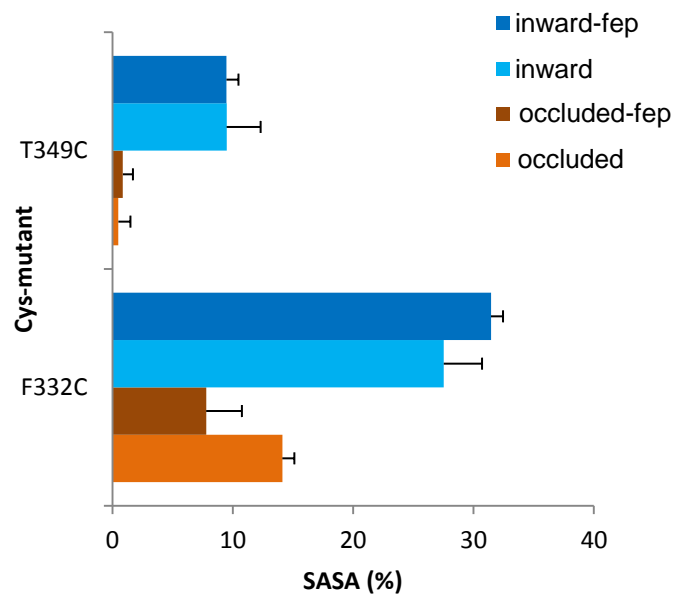

Supplement: NIHMS570371-supplement-01.pdf [file NIHMS570371-supplement-01.pdf]
